# Supplementary material
Source: PubMed Central journal article supplement (PMC4656194)

## Supplement Figures

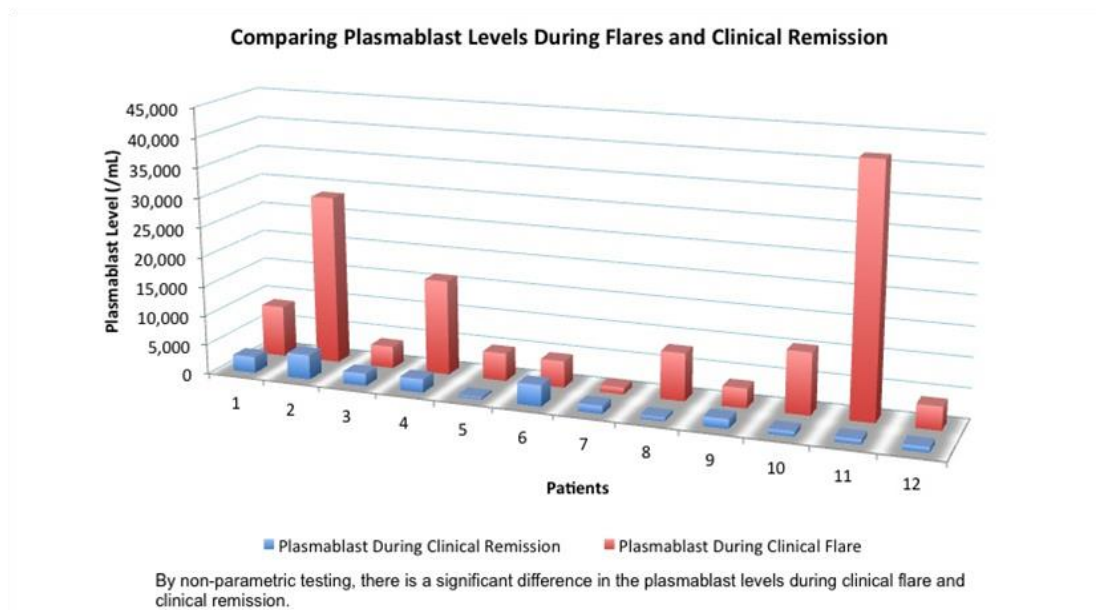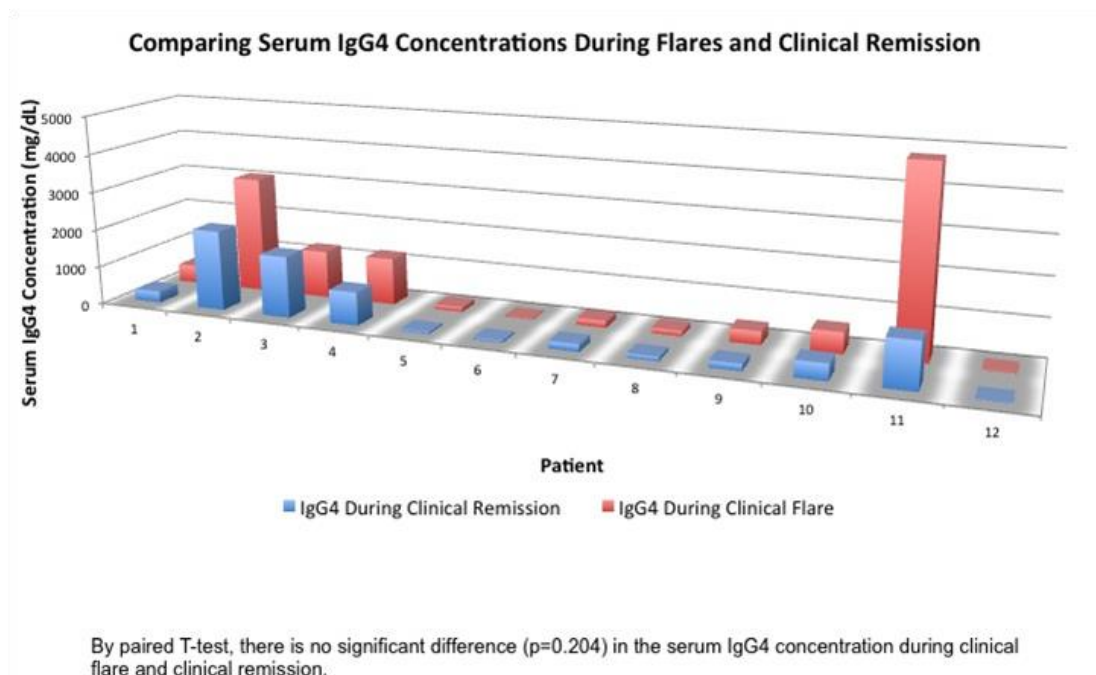

Supplement: NIHMS736849-supplement-Data_Supplement.pdf [file NIHMS736849-supplement-Data_Supplement.pdf]
